# Supplementary material for: Retracted Article: Red luminescent manganese-doped zinc sulphide nanocrystals and their antibacterial study
Source: Royal Society of Chemistry journal article supplement (doi:10.1039/c3tb21363c), 2013-11-02
Supplement: c3tb21363c.pdf [file c3tb21363c.pdf]

Supporting Information

## Red Luminescent Manganese-Doped Zinc Sulphide Nanocrystals and its antibacterial study

Prashant. K. Singh<sup>\*a</sup>, Prashant K Sharma<sup>a,c</sup>, Manvendra Kumar<sup>a</sup>, Shanthi Sundaram<sup>b</sup>, Ranu Dutta<sup>a</sup>, and Avinash. C. Pandey<sup>a</sup>

<sup>a</sup> Nanotechnology Application Centre, University of Allahabad, Allahabad, 211002, India.

<sup>b</sup> Centre for Biotechnology, Faculty of Science, University of Allahabad, Allahabad, 211002, India.

<sup>c</sup> Present Address: Functional Nanomaterials Research Lab, Department of Applied Physics, Indian School of Mines, Dhanbad 826004, India.

\* To whom correspondence should be addressed, E-mail: prashant2singh@gmail.com

### Table of Content:

1. Table S1: Zone of Inhibition (in mm) for MIC.
2. Figure S1: Bacterial Survival Rate (%) of (i) *E. coli* (ii) *K. pneumoniae* (iii) *B. subtilis* and (iv) *S. aureus* against biotin capped ZnS:Mn<sup>2+</sup> NCs (A) Control (B) 100 ng/ml, (C) 200 ng/ml, (D) 300 ng/ml (E) 400 ng/ml (F) 500 ng/ml and (G) 600 ng/ml. of NCs

MIC Valu

**Table S1:** Zone of Inhibition (in mm) for MIC:

| Bacterial Strain     | Biotin Capped ZnS:Mn <sup>2+</sup> NCs Concentrations (ng/ml) |     |     |     |     |     |     |
|----------------------|---------------------------------------------------------------|-----|-----|-----|-----|-----|-----|
|                      | 0                                                             | 100 | 200 | 300 | 400 | 500 | 600 |
| <i>E. coli</i>       | -                                                             | -   | -   | 3   | 3   | 5   | 5   |
| <i>K. pneumoniae</i> | -                                                             | -   | -   | 2   | 2   | 2   | 4   |
| <i>B. subtilis</i>   | -                                                             | 2   | 2   | 2   | 3   | 3   | 4   |
| <i>S. aureus</i>     | -                                                             | -   | -   | -   | 1   | 2   | 3   |

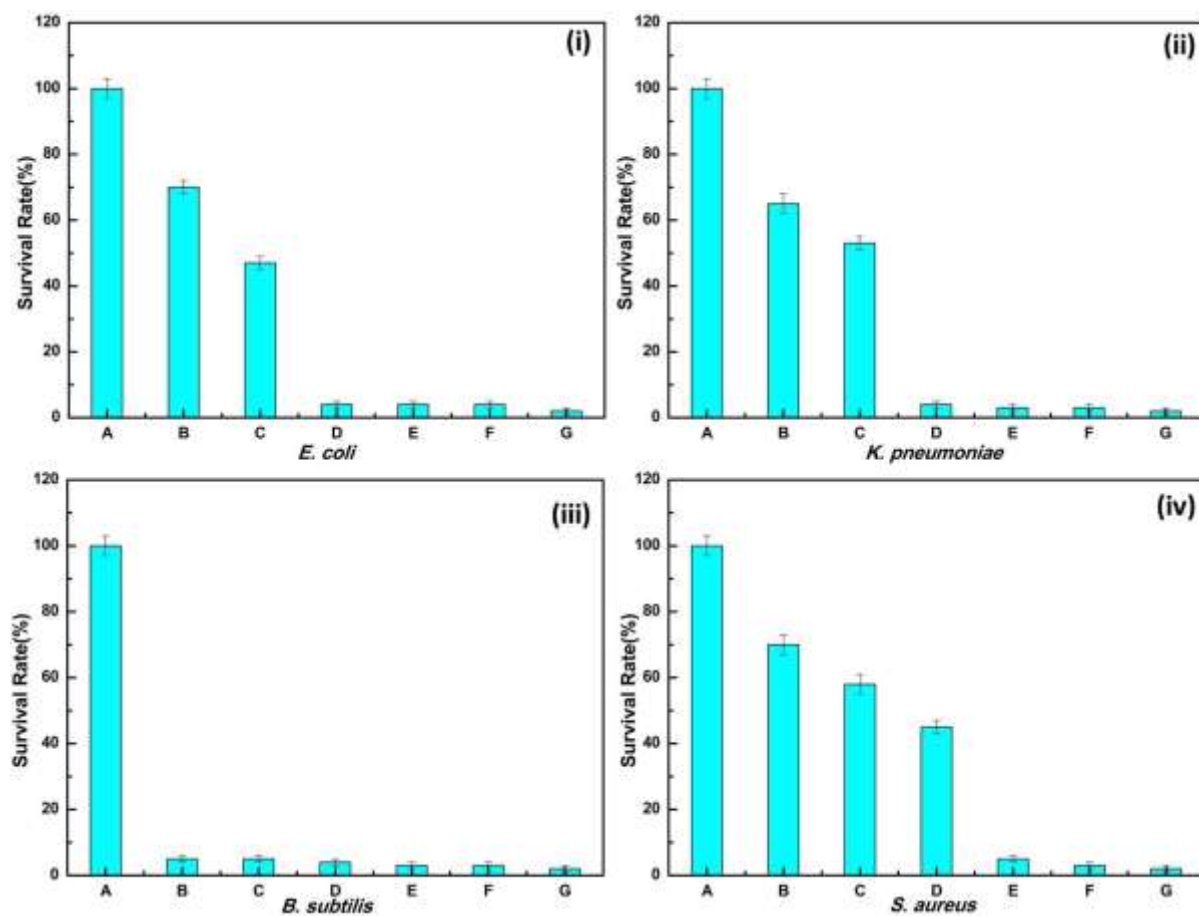

**Figure S1:** Bacterial Survival Rate (%) of (i) *E. coli* (ii) *K. pneumoniae* (iii) *B. subtilis* and (iv) *S. aureus* against biotin capped ZnS:Mn<sup>2+</sup> NCs (A) Control (B) 100 ng/ml, (C) 200 ng/ml, (D) 300 ng/ml (E) 400 ng/ml (F) 500 ng/ml and (G) 600 ng/ml.
